# Supplementary material
Source: PubMed Central journal article supplement (PMC3272961)

## Supplemental Figure Legends

**FIG S1. Confirmation of mutant survival and growth.** Following Ham's F12 survival and RnP growth assays, 2  $\mu$ l of each culture was plated on Blood Agar plates to ensure optical density did in fact correlate with bacterial survival and that the culture was not contaminated. In this example, wild type (WT) bacteria that were capable of growth in RnP media given any of the single purine bases listed, but did not survive for 48 hours when grown in 0.1% catalase.  $\Delta$ *guaA* was capable of survival in media containing guanine or guanosine and  $\Delta$ *guaB* was capable of survival on xanthine, guanine, or guanosine.

**FIG S2. Sequence alignment of *purD* genes.** Genes were compared between *Escherichia coli*, *Campylobacter jejuni*, and *Helicobacter pylori* (Genbank accession numbers are GI:16131835, GI:218562862, and GI:208433042, respectively). Highlighted residues indicate P-loop and ATP binding sites. Figure adapted from Sampei *et al.*, Crystal structures of glycinamide ribonucleotide synthetase, PurD, from thermophilic eubacteria, *Journal of Biochemistry*, 2010, 148(4), 429-38, by permission of Oxford University Press.

**FIG S3. Cladogram of epsilon proteobacteria.** Cladogram for the order of campylobacterales (generated via PATRIC multi-gene phylogenetic tree viewer). Species are listed in order of similarity at the genome level. Species are labeled according to the presence or absence of three purine salvage pathway associated genes: *deoD*; purine nucleoside phosphorylase, *guaC*; GMP reductase, and *gpt*; guanine phosphoribosyltransferase. Those species lacking more than 4 of the 10 *pur* genes

required for inosine monophosphate (IMP) production and thereby, *de novo* purine nucleotide biosynthesis, are highlighted in grey.

**FIG S4. Alternate potential metabolic pathways by which *H. pylori* is capable of generating GMP and AMP from the single purine source, adenine.** (A) Base pathway for adenine processing. Pathway thermodynamics assuming (B) strong APRTase activity coupled with an adenine deaminase and (C) weak APRTase activity coupled with an adenosine deaminase. Steps are described in text.

**TABLE S1. Primers used in this study.**

| Primer       | sequence                                         |
|--------------|--------------------------------------------------|
| guaA P1      | GTTTGAAATGTTGCGTG GGG                            |
| guaA P2      | <u>ATCCACTTTTCAATCTATATCAATCAGCTGTGTGTATTGGC</u> |
| guaA P3      | <u>CCCAGTTTGTGCGACTGATAAAGTGAGCGGTATCAATAGGG</u> |
| guaA P4      | CAATATCTTCTAAGATAGCC                             |
| guaA seq F   | TATAATACCCAATCAATGCG                             |
| guaA seq R   | AAATTCAAATTCAAATACCC                             |
| guaA int F   | ATTGCGCGATTGAAAACGGC                             |
| guaA int R   | TTGATCACTTTTGAAGGCC                              |
| guaB-P1a     | TTGATGGGGTTCGTTACGGG                             |
| guaB-P2a     | <u>ATCCACTTTTCAATCTATATCAAACGCTGGACTTTCTAGGC</u> |
| guaB-P3a     | <u>CCCAGTTTGTGCGACTGATAATAGAAATCACTAGCGCGGGG</u> |
| guaB-P4a     | GCTCCAGCTAGCCGTAGGGG                             |
| guaB-seqF    | GCCTTGAAAGAAATGGGGC                              |
| guaB-seqR    | GCGAGATGATCTCAATAGGG                             |
| guaB int - F | TTTGAGTAAAAAAGTGGGCG                             |
| guaB int - R | TCATCACGCTTGATGCCCC                              |
| guaBF+rdx5'  | <u>CGGTCATTACATGCAAAATCATTGTTGTCTTAAGCAGTGGG</u> |
| guaBR+kamF   | <u>TTGGCGTATAACATAGTATCGTGAAAAAGTTTCTCTAAGCC</u> |
| P1 guaC      | TTATTACCTATCAAAACCGC                             |
| P2 guaC      | <u>ATCCACTTTTCAATCTATATCCGTATCGCACTCTGAACGGC</u> |
| P3 guaC      | <u>CCCAGTTTGTGCGACTGATAACAATCTCCTATGCAGGCGGG</u> |
| P4 guaC      | ACAAGTAGAAGCGTTAGGGG                             |
| guaC seq - F | ATCGCTCAAATCGCCTTCGG                             |
| guaC seq - R | AAAGGAAAGGTTTGAGCGCG                             |
| guaC int - F | ATGCAAACAATCATCAACCG                             |
| guaC int - R | AGCGTGTCTTTAATGAGCC                              |
| guaCF+rdx5'  | <u>CGGTCATTACATGCAAAATCAAAGCGTATTGATCTTGCCC</u>  |
| guaCR+kamF   | <u>TTGGCGTATAACATAGTATCGAACCATTCTTTCTGCTTCGC</u> |
| purA - P1    | TCTTAGCAGCGCTGTTAAGG                             |
| purA - P2    | <u>ATCCACTTTTCAATCTATATCACAATTTTCCCTTTCCCCTC</u> |
| purA - P3    | <u>CCCAGTTTGTGCGACTGATAATATTGAAAAAGAAGTGGGGG</u> |
| purA - P4    | TTCTACGCATGCAAGCCCC                              |
| purA seq F   | GCTTTGGCATTCAAGTGGGC                             |
| purA seq R   | CATTGCAACAATTCTTGCGC                             |
| purA int - F | TACCATTGTGCATAAGGGGG                             |
| purA int - R | GAGTAGGCTTTCGTGATGCC                             |
| purB- P1     | TATCATGGCAAGCCATGGGG                             |
| purB - P2    | <u>ATCCACTTTTCAATCTATATCGTTTGCTCATTCCATAGGGC</u> |
| purB - P3    | <u>CCCAGTTTGTGCGACTGATAATTACACTAAAAATGTGGGGG</u> |
| purB - P4    | TTGGCCATAAAGAGAGGCGC                             |
| purB seq F   | GGCTCTACGCCATTAGGGGC                             |
| purB seq R   | ATCCCAGATTGAACCCGGC                              |
| purB int - F | GATTGTGAAAAAATCTGCGC                             |
| purB int - R | TATTCTCGCTCAATATGGGG                             |
| purD - P1    | AGTCTCTACGCATTTGGTGG                             |
| purD - P2    | <u>ATCCACTTTTCAATCTATATCTGAGCCAAAGCATACTCTCG</u> |

purD - P3 CCCAGTTTGTGCGCACTGATAATTGAAGGCATGTTTTATCGC  
 purD - P4 TAAATAGCCCTACTGGGGC  
 purD seq F CTTTTTGATGAGCCGG  
 purD seq R CTACAAACCATAAAAAGGGG  
 purD int - F TGGCACTCAAGATTTAGGCG  
 purD int - R AGAAAAAGTTTGCAGGAGCG  
 surE - P1 TTTTAAGCGCTAATGGGGGG  
 surE - P2 ATCCACTTTTTCAATCTATATCATGCCTTTTGCATGGTAGCC  
 surE - P3 CCCAGTTTGTGCGCACTGATAAAAACCATGCCTCTATCACGC  
 surE - P4 AGCGTAATAATCCGTAGGGG  
 surE seq - F AAACGCTTTATTAGAAAGCC  
 surE seq - R AAAATTTGCTCGCTAAAGCC  
 surE int - F AAATCTATGTGGTCGCCCG  
 surE int - R GTCTGTCTTCATTTTCGCGC  
 gpt - P1 AACACCACAAGCTACACCGC  
 gpt - P2 ATCCACTTTTTCAATCTATATCTTGTGGTACTAATTCCAAGC  
 gpt - P3 CCCAGTTTGTGCGCACTGATAAATGGATTGATTTCTTTGGG  
 gpt - P4 GAGCATTTTTGGTTACAGCC  
 gpt seq F TTGGAGGGAGTCAAAAAGCG  
 gpt seq R ATGAGCTAGAATCTTGAGCG  
 gpt int - F GTGTGCGTGATGCGAGGGGG  
 gpt int - R ATCGGCTTTGTATTTTCGCGC  
 apt - P1 ACAGAATTTGAACAAGGCCG  
 apt - P2 ATCCACTTTTTCAATCTATATCGTCTTTCATTCTCTGATGC  
 apt - P3 CCCAGTTTGTGCGCACTGATAATCCAACCTTTTAGAAGAACGC  
 apt - P4 TCTTCTCCTAAATACCACGC  
 apt - seq F CTAATGTCTTGTGCTTGGGC  
 apt - seq R GTAATATTAGCGCATAAGGG  
 apt - int F ATCAAAGATATTACCACGC  
 apt - int R TATGCATTGAGCTTGTAGGG  
 apt-F + rdx5' CGGTCATTACATGCAAAATCACAGAATTTGAACAAGGCCG  
 apt-R + kan F TTGGCGTATAACATAGTATCGTATTCTTCCAAAATTCACCC  
 deoD - P1 ATATTTACGCCCATGTGGGG  
 deoD - P2 ATCCACTTTTTCAATCTATATCATTGAGGATAAAAATCGCCG  
 deoD - P3 CCCAGTTTGTGCGCACTGATAACTTAAGCCCTAAAGAAAGGG  
 deoD - P4 GCATGCAAGAGTGATGCCCG  
 deoD seq - F CATTGAAGAAAAGCAAGGCG  
 deoD seq - R CTTACCGATTTGATAACCC  
 deoD int - F ATGCGGCGATCCCTTAAGGG  
 deoD int - R GATTAAGTGATCCGAAACCG  
 deoD- P2(Kan) TTGGCGTATAACATAGTATCGATTGAGGATAAAAATCGCCG  
 deoD- P3(Kan) TAGTACCTAGATTTAGATGTCCTTAAGCCCTAAAGAAAGGG  
 apt - P2(Kan) TTGGCGTATAACATAGTATCGGTCTTTCATTCTCTGATGC  
 apt - P3(Kan) TAGTACCTAGATTTAGATGTCCTCAACTTTTAGAAGAACGC  
 surE - P2(Kan) TTGGCGTATAACATAGTATCGATGCCTTTTGCATGGTAGCC  
 surE - P3(Kan) TAGTACCTAGATTTAGATGTCAAACCATGCCTCTATCACGC  
 RDX5`F TGGTAGTTGTTTCGTTAGGG  
 RDX5`R GATTTTGCATGTAATGACCG  
 RDX3`F+kamR TAGTACCTAGATTTAGATGTCGCTCAAATGCTTGGCG  
 RDX3`R CACAACCAAGTAATCGCATC  
 KAMF-E1 CGATACTATGTTATACGCCAA  
 KAMR-E2 GACATCTAAATCTAGGTACTA  
 Hp gptF+ rdx5' CGGTCATTACATGCAAAATCAACACCACAAGCTACACCGC  
 Hp gptR+ kanF TTGGCGTATAACATAGTATCGACATCACCTCTGAATCCACC

|                |                                                    |
|----------------|----------------------------------------------------|
| Ec gptR + kanf | <u>TTGGCGTATAACATAGTATCG</u> TTAGCGACCGGAGATTGGCG  |
| Ec hptR + kanf | <u>TTGGCGTATAACATAGTATCG</u> T TACTCGTCCAGCAGAATCA |
| E.c. gpt F     | ATGAGCGAAAAATACATCGT                               |
| E.c. gpt R     | TTAGCGACCGGAGATTGGCG                               |
| E.c. hpt F     | ATGGTTAGAGATATGAAACA                               |
| E.c. hpt R     | T TACTCGTCCAGCAGAATCA                              |
| rdxA_P1.1      | GAGTTATTTTTTATGGGCGG                               |
| rdxA_P4.1      | TCTCAAGCCTTAATCGATCG                               |
| rdxA seq F     | AGCCAGATAGCCAAATGGGG                               |
| rdxA seq R     | GAAACGCTTGAAAACACCCC                               |

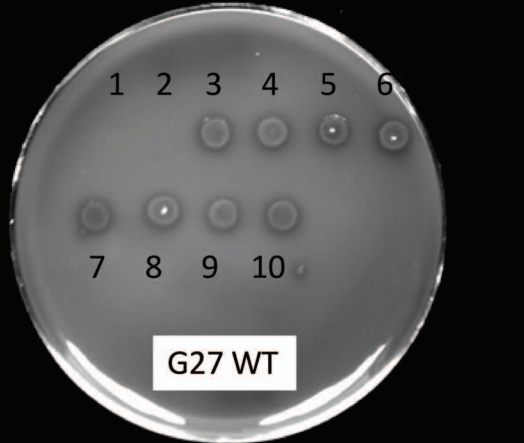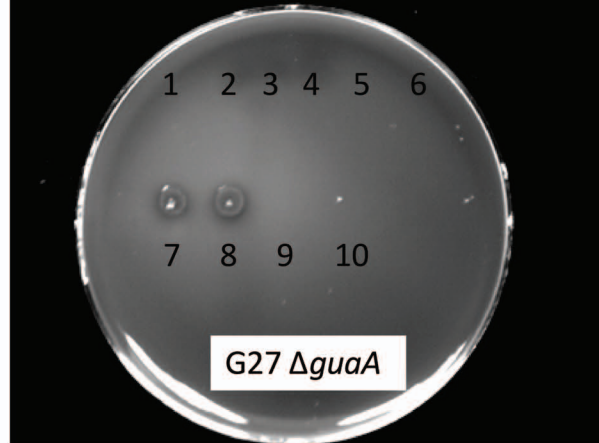

48 hour 2mL cultures from 12 well plates:  
2 $\mu$ l spotted

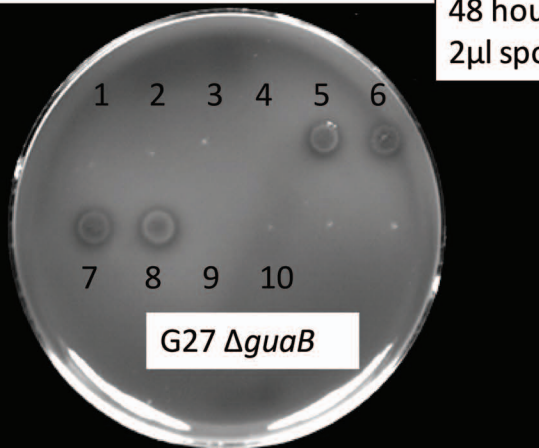

1,2, RnP + catalase  
3,4, RnP + hypoxanthine  
5,6, RnP + xanthine  
7,8, RnP + guanine  
9,10, RnP + adenine

purD

E.coli\_K12 MK-----VLVIGNGGEEHALAWKAAQSPLVETVVFVAPGNAGTALEPALQ  
 C.jejuni\_NCTC11168 MK-----IMILGSGAEEYSIALALRRVVDKNLEFYFAPGNNGATES--LGT  
 H.pylori\_G27 MKDNNNYYNVLIVGNKGEYALAQRLQQDERVNALYFCLNGGGTQD--LGE  
 \*\* : : : : : . \* : : : : : : : : : : . . . . \* : : \*

N Domain

E.coli\_K12 NVAIGVTDIPALLDFAQNEKIDLTIVGPEAPLVKGVVDTFRAAGLKIFGP  
 C.jejuni\_NCTC11168 N--LNLKDPVVLATYAKEKGFDLICIVGSESFLEAGVVDFIFKQQGLAIFGP  
 H.pylori\_G27 N--LECEHYEHIVELALKKQIHLAIISEBELLVGLTEMLEKAGILVFGA  
 \* : : : : : : : : : : \* : : : : \* \* \* \* \* \* \* \* \* : : : \* : \*

B' Domain

E.coli\_K12 TAGAAQLEGSVAFTKDFLARHKIPTAEYQNFTEVEPALAYLREKGAPIVI  
 C.jejuni\_NCTC11168 SKAAAMLETSVFMKSFLLKRYRIKTKPLNTNDIEKAKNFYISLTPPIIV  
 H.pylori\_G27 SKAAAKLEASVSYMKAFVKECGEKSIVSYFETNDLKEALNHIIQNASPFLVI  
 : \* \* \* \* : : : \* \* : . \* : \* : : : : : : : \* : . : . \* : : :

B Domain

E.coli\_K12 MADGLASAKGVIVAMTLEEAEEAVHDMLAGNAFGDAGHRIVIVKFDLGEV  
 C.jejuni\_NCTC11168 MADGLCAGKGVIIAKTHEEAIEETAKMLSGESFGDAGKLVVIVKFDLGEV  
 H.pylori\_G27 MAL----NNTSIVHQEEEAIK-----ILEDAFKQSNPEVIIKFDLGEV  
 \*\* : : \* \* : : : \* \* \* : : : : : : : \* : : \* : : : : \* \* \* \* \*

E.coli\_K12 ASFIVMVDGEHVLPMASTQVHVRVGDKDTGPIVGGMGAYSPAPVVTDVH  
 C.jejuni\_NCTC11168 LSIFAVCDGNDFVLLPAACVHKLDDNDQGPVGGMGAYAPSSLANESLL  
 H.pylori\_G27 LSVTALIANDDFILLPFCQNYRLEEGDNGVIVGGMGAIAPANFFSNELE  
 \* . : : : . : : : : . \* : : : : : \* \* \* \* \* \* \* \* \* : : : \* : :

A Domain

E.coli\_K12 QRTMERIIWPTVKGMAAEGNTYTGFLYAGLVLDKQG---NPKVIKFNCRF  
 C.jejuni\_NCTC11168 RKVQKDIILPTLAGMKKEGAEFCGVLFIGAVVGN----KPYVIVFNVRF  
 H.pylori\_G27 EKIKNHIFKPTLEKLDQADNTPFKGVLLAEIVIIIEKGVLEPYLIDFSVRF  
 . : : \* : \* \* : : : . : . : \* \* : \* : : \* : : : : \* \* \*

E.coli\_K12 GDPEVQPIMLRMKSDLVELCLAACESKLDEKTSSEWDERASLGVVMAAGGY  
 C.jejuni\_NCTC11168 GDPECEVLMPLIE-DPLELILAATQRRLRHSKIKIKKEFVAVGVVCASENY  
 H.pylori\_G27 KDIECQTILPLESLLDLCLATAKGEINSLVLSFVMSVALVSRNY  
 \* \* \* : : : : : . \* \* \* \* : : \* \* . : . : . \* \* : : \*

C Domain

E.coli\_K12 PGDYRTGDVVIHGLPLEEVAGGKVFHAGTKLADDEQVVTNGGIVLVCVTALG  
 C.jejuni\_NCTC11168 PYKSSPKSEITVNNIPEN-S-HISYAGVSL-EDGKLMADGGIVLVCVGTG  
 H.pylori\_G27 PTSSSPKQTLYIDPVDEKKG-HLLLGEVEQ-DNGVFESSGGIVIFALGRG  
 \* . . . : : : \* . : : : . . . : : . : : \* \* \* \* : \*

E.coli\_K12 HTVAEAQKRAYALMTDIHWDDCFCRCKDIGWRAIE-REQN  
 C.jejuni\_NCTC11168 KSIEEAQKNAYKLCDNVNPKGKQYRKDIAHQVL-----K  
 H.pylori\_G27 KSLLEARNHAYEIAQKVHFEQMPYRKDIGFKVLDLKEYS  
 : : : \* : : : \* \* : : : : : : \* \* \* \* : : : \*

Figure S2

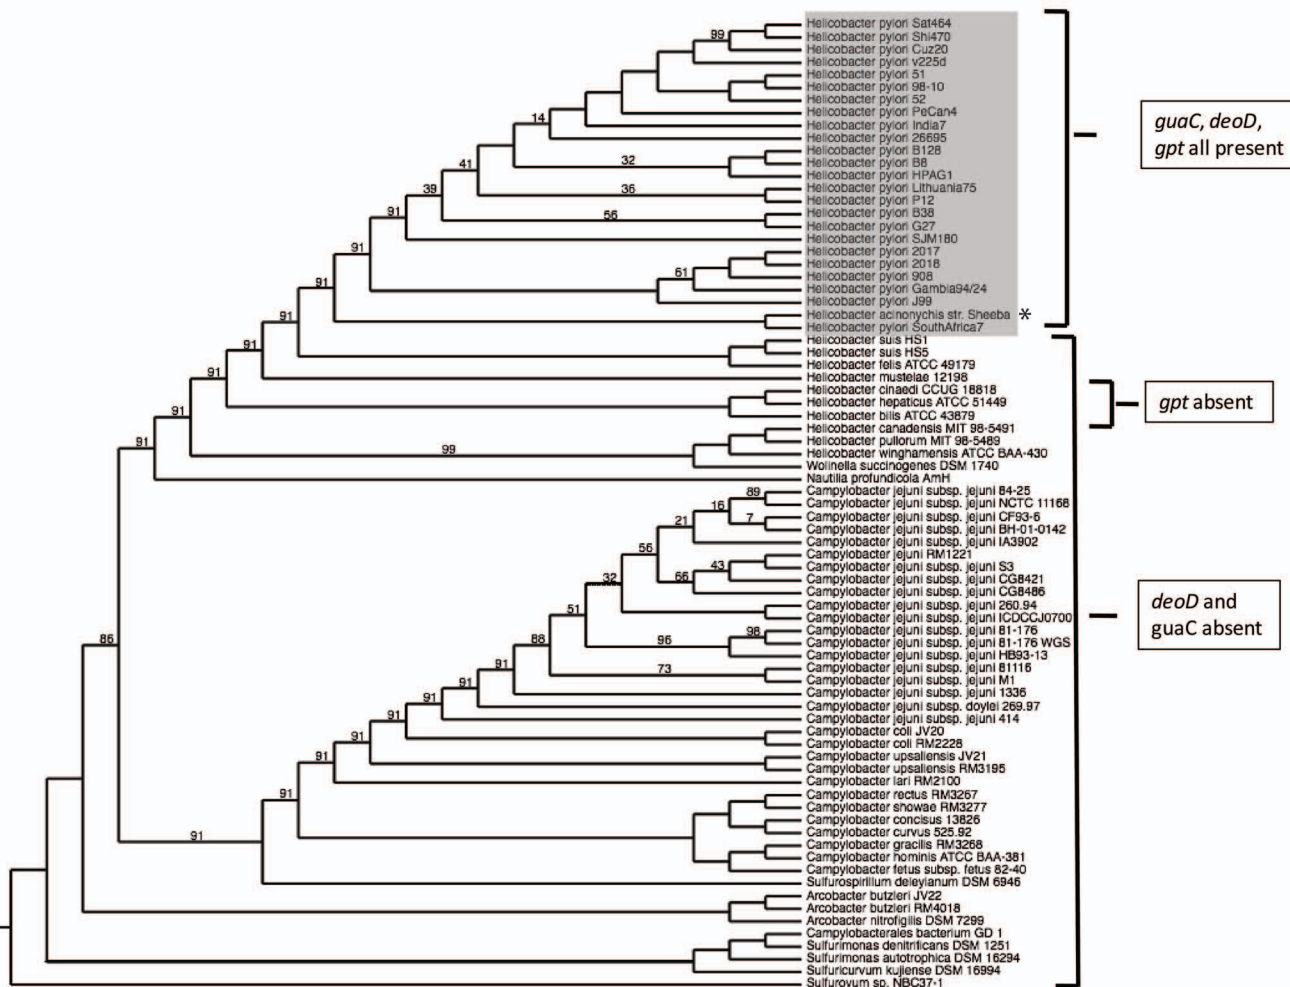

\* indicates absence of *guaC* in *H. acinonychis*



A

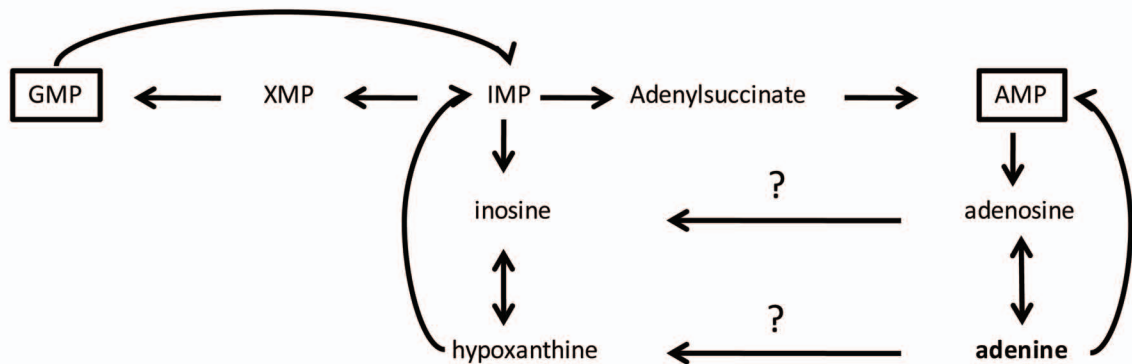

B

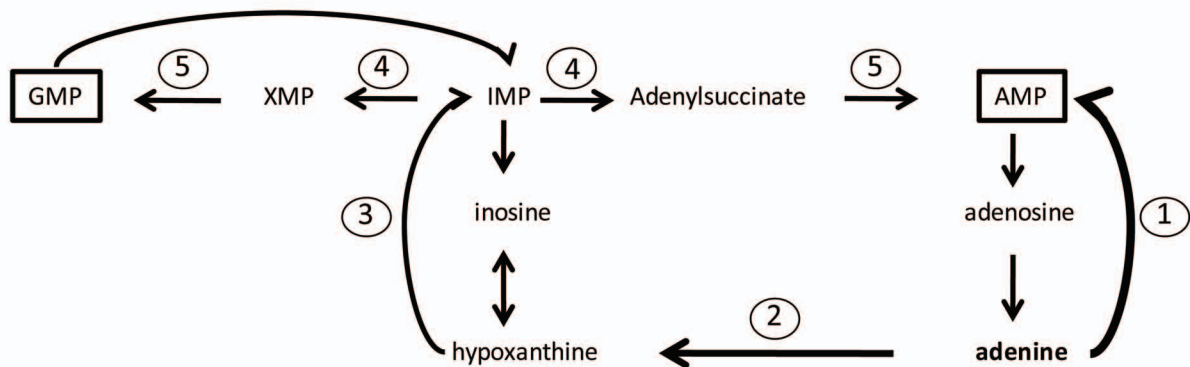

C

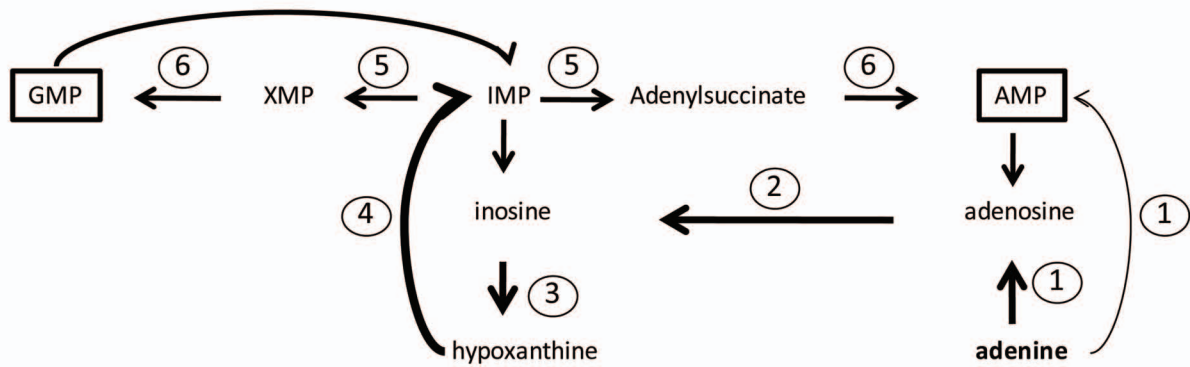

Supplement: supp_194.4.839_SupplementalMaterialREVISED.pdf [file supp_194.4.839_SupplementalMaterialREVISED.pdf]
